# Supplementary material for: Inuit uses of weather, water, ice, and climate indicators to assess travel safety in Arctic Canada, Alaska, and Greenland: a scoping review
Source: Atypon-hosted journal article supplement (doi:10.1139/facets-2024-0107), 2025-01-01
Supplement: facets-2024-0107suppla.pdf [file facets-2024-0107suppla.pdf]

# **Inuit uses of weather, water, ice, and climate indicators to assess travel safety in Arctic Canada, Alaska, and Greenland: a scoping review**

Breanna Bishop<sup>1\*</sup>, Emmelie Paquette<sup>2</sup>, Natalie Carter<sup>3</sup>, Gita Ljubicic<sup>3</sup>, Eric C.J. Oliver<sup>1</sup>, Claudio Aporta<sup>4</sup>

<sup>1</sup> Department of Oceanography, Dalhousie University, Halifax, NS, Canada

<sup>2</sup> Department of Geography and Environmental Studies, Carleton University, Ottawa, ON, Canada <sup>3</sup> School of Earth, Environment and Society, McMaster University, Hamilton, ON, Canada

<sup>4</sup> World Maritime University, Malmo, Sweden

\*Corresponding author: breanna.bishop@dal.ca

## **Search strategy:**

Titles, abstracts, keywords searched

(Inuit OR Inuk OR Inuvialuit OR I?upia\* OR Yupik OR Yup'ik OR Cup'ik OR Kalaaliit OR Inughuit OR Tunumiit OR "Greenlan\* Inuit" OR Eskim\*)

AND

("Inuit knowledge" OR "Inuit Qaujima\*" OR "IQ" OR "traditional knowledge" OR "traditional ecological knowledge" OR "local knowledge" OR "TEK" OR "local ecological knowledge" OR "LEK")

AND

(Canada OR "Inuit Nunangat" OR "Inuvialuit Settlement Region" OR ISR OR "Northwest Territories" OR NWT OR Nunavut OR Nunavik OR Qu?bec OR Nunatsiavut OR Labrador OR Alaska OR Greenland OR "Inuit Nunaat" OR "Kalaallit Nunaat" OR "North of 60" OR Arctic OR "circumpolar north" OR "the north" OR polar OR "sub-polar" OR "sub-arctic")

AND

("climat\* change" OR "environmen\* change" OR "chang\* climat\*" OR "chang\* environment\*" OR weather OR water OR marine OR sea OR ocea\* OR river OR lake OR ice OR climate OR land OR ground OR "on the land" OR coas\* OR seaso\* OR trave\* OR mobil\* OR movemen\* OR "travel safe\*" OR "safe travel" OR hunt\* OR harves\* OR gathe\* OR fish\* OR safe OR safe\*)
